# Supplementary material for: Chagas Disease in Pregnant Women from Endemic Regions Attending the Hospital General de Mexico, Mexico City
Source: MDPI journal article supplement (doi:10.3390/tropicalmed7010008), 2022-01-11
Supplement: s1 [file s1]

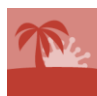

# Supplementary material of Chagas Disease in Pregnant Women from Endemic Regions Attending the Hospital General de Mexico, Mexico City

Table S1. Probes Used in Multiplex qPCR Assay.

| Target Sequence        | Oligonucleotide | Sequence (5'–3')              |
|------------------------|-----------------|-------------------------------|
| <i>T. cruzi</i> SatDNA | Cruzi1          | ASTCGGCTGATCGTTTTCGA          |
|                        | Cruzi2          | AATTCCTCCAAGCAGCGGATA         |
|                        | Cruzi3          | FAM-CACACACTGGACACCAA-NFQ-MGB |
| RNAse P                | RNAse P Assay   | unknown                       |
